# Supplementary material
Source: HighWire-hosted journal article supplement (https://militaryhealth.bmj.com/content/military-2022-002280)
Supplement: inline-supplementary-material-1 [file inline-supplementary-material-1.pdf]

## ANNEX 1: INFORMED CONSENT &amp; QUESTIONNAIRE

**Etude d'incidence Covid Long personnel de la Défense**

**SECRET MEDICAL**

**Information**

Consentement éclairé  
Données générales  
Symptômes Covid-19  
Etat de santé général

Vous êtes invité(e) à participer de façon volontaire à une étude. Avant d'accepter d'y participer, il est important de lire ce formulaire qui en décrit l'objectif et les modalités pratiques. Vous avez le droit de poser à tout moment des questions en rapport avec cette étude.

**Bénéfices et risques**

Nous ne pouvons vous assurer que si vous acceptez de participer à cette étude, vous tirerez personnellement un quelconque bénéfice direct de votre participation.

Cependant, les informations obtenues grâce à cette étude peuvent contribuer à une meilleure connaissance des effets à long terme d'une infection au COVID-19 et permettre une prise en charge adaptée notamment au niveau de votre travail.

**Assurance**

Si vous ou vos ayants droit (famille) subissez un dommage lié à cette étude, ce dommage sera indemnisé par le promoteur de l'étude conformément à la loi relative aux expérimentations sur la personne humaine du 7 mai 2004. Vous ne devez prouver la faute de quiconque.

Noms et coordonnées de l'assureur : Ethias SA, rue des Croisiers n°24 à Liège  
Numéro de police d'Assurance : 45.399.955

**Protection de la vie privée**

Votre identité et votre participation à cette étude demeureront strictement confidentielles. Chaque personne sera nommée par un numéro. Vous ne serez pas identifié(e) par votre nom ni d'aucune autre manière reconnaissable dans aucun des dossiers, résultats ou publications en rapport avec l'étude.

Le gestionnaire des données est DG Health & Well Being - Service Health Information Systems and Technology.

Ces données seront conservées pendant 2 années.

La protection des données personnelles est assurée par la loi du 30 juillet 2018 relative à la protection de la vie privée et par les réglementations européennes (réglementation générale européenne sur la protection des données à caractère personnel [RGPD] du 25 mai 2018) et belges en vigueur. Ces droits sont également garantis par la loi du 22 août 2002 relative aux droits du patient.

Selon le RGPD, vous disposez d'un droit de regard sur le traitement de vos données. Si vous avez des questions à ce sujet, vous pouvez contacter le responsable de la protection des données du centre d'étude à l'adresse suivante : [privacy@uclouvain.be](mailto:privacy@uclouvain.be). En cas de plainte concernant le mode de traitement de vos données, vous pouvez contacter l'Autorité Belge de Protection des Données - Rue de la Presse 35 - 1000 Bruxelles - Tél. : (0) 274 48 00 - e-mail : [contact@apd-gba.be](mailto:contact@apd-gba.be)

© MedICS 2021

**Consentement éclairé**

1. Je déclare avoir lu l'information qui précède et accepter de participer à l'étude :  
Incidence du COVID-Long parmi le personnel de la Défense testé positif au COVID-19 par PCR d'août 2020 à mai 2021.

2. On m'a remis une copie de ce formulaire de consentement éclairé signé et daté, ainsi que de la note d'information destinée au participant. J'ai reçu une explication concernant la nature, le but, la durée de l'étude et j'ai été informé(e) de ce qu'on attend de ma part. On m'a donné le temps et l'occasion de poser des questions sur l'étude; toutes mes questions ont reçu une réponse satisfaisante.

3. J'ai été informé(e) de l'existence d'une assurance.

4. Je sais que cette étude a été soumise et approuvée par le Comité d'Ethique Hospitalo-Facultaire Saint-Luc - UCLouvain.

5. Je suis libre de participer ou non, de même que d'arrêter l'étude à tout moment sans qu'il soit nécessaire de justifier ma décision et sans que cela n'entraîne le moindre désavantage.

6. En signant ce document, j'autorise l'utilisation des données me concernant dans le respect de

- La loi belge du 30 juillet 2018 relative à la protection de la vie privée
- La loi du 22 août 2002 relative aux droits du patient
- La loi du 7 mai 2004 relative à l'expérimentation sur la personne humaine
- Les réglementations européennes (réglementation générale européenne sur la protection des données à caractère personnel [RGPD] du 25 mai 2018) et belges en vigueur

7. Je n'ai subi aucune pression physique ni psychologique induite pour ma participation à l'étude.

Je consens de mon plein gré à participer à cette étude

© MedICS 2021

Page précédente Commencer

Etude covid  
https://medsurveysdev.med.mil.be/process

Etude d'incidence Covid Long personnel de la Défense

SECRET MEDICAL

Information  
Consentement éclairé  
Données générales  
Symptômes Covid-19  
Etat de santé général

Données générales

Situation au moment de votre contamination

Unité :  Taille en cm :   
Grade :  Poids en kg :   
Catégorie opérationnelle :  Groupe sanguin :   
Sexe :

De quelle proposition votre fonction se rapproche-elle le plus ?

Fonction essentiellement administrative (travail de bureau)  
 Fonction combattante (unité de combat)  
 Personnel naviguant à la Marine  
 Personnel naviguant à la Force Aérienne  
 Personnel soignant (contacts avec des patients)  
 Fonction logistique **sans appui direct** aux unités de combat (reste à la caserne)  
 Fonction logistique **avec appui direct** aux unités de combat (va sur le terrain)

Partez-vous ou devez-vous partir en mission ou en manoeuvre à l'étranger dans le cadre de votre fonction ?

Oui  
 Non  
 Je ne sais pas

Laquelle des propositions ci-dessous est d'application pour vous ?

Je suis un fumeur quotidien  
 Je suis un fumeur occasionnel  
 Je suis un ex-fumeur  
 Je suis non-fumeur

1/10  
●○○○○○○○○

© MedCIS 2021

Page précédente Page suivante

Etude covid  
https://medsurveysdev.med.mil.be/process

Etude d'incidence Covid Long personnel de la Défense

SECRET MEDICAL

Information  
Consentement éclairé  
Données générales  
Symptômes Covid-19  
Etat de santé général

Données générales

Depuis votre infection par le covid-19, combien d'heures de sport pratiquez-vous en moyenne et habituellement ?

Je ne pratique pas de sport  
 Jusqu'à 3 heures par semaine  
 De 3 à 7 heures par semaine  
 Plus de 7 heures par semaine

Avant votre infection, combien d'heures de sport par semaine pratiquez-vous en moyenne et habituellement ?

Je ne pratique pas de sport  
 Jusqu'à 3 heures par semaine  
 De 3 à 7 heures par semaine  
 Plus de 7 heures par semaine

Avez-vous été en incapacité de travail (AMS) en raison de votre covid-19 ?

Non (à l'exception de la période d'isolement)  
 Oui, moins de 2 semaines  
 Oui, entre 2 et 4 semaines  
 Oui, entre 1 et 2 mois  
 Oui, entre 2 et 3 mois  
 Oui, entre 3 et 6 mois  
 Oui entre 6 et 12 mois

2/10  
●○○○○○○○○

© MedCIS 2021

Page précédente Page suivante

Etude covid  
https://medsurveysdev.med.mil.be/process

Etude d'incidence Covid Long personnel de la Défense

SECRET MEDICAL

Information  
Consentement éclairé  
Données générales  
Symptômes Covid-19  
Etat de santé général

3/18

Données générales

Dans la liste suivante, indiquez les maladies dont vous souffriez AVANT votre infection au covid

- Maladie du coeur ou des vaisseaux sanguins (hypertension artérielle, maladie des artères coronaires, infarctus du myocarde, insuffisance cardiaque, fibrillation auriculaire, ...)
- Maladie de l'appareil respiratoire (asthme, bronchite chronique obstructive, sinusite chronique, embolie pulmonaire, ...)
- Maladie de l'appareil digestif (diabètes chroniques, intolérance au gluten, syndrome de malabsorption, reflux gastro-œsophagien, maladie de Crohn, colite ulcéro-hémorragique, cœliaque, ...)
- Maladie de la peau (psoriasis, eczéma, acné, ...)
- Maladie du système locomoteur (arthrite rhumatoïde, arthrite psoriasique, spondylarthrite ankylosante, arthrose, ...)
- Trouble de santé mentale (dépression, syndrome anxieux, burnout, syndrome de stress post-traumatique, alcoolisme, ...)
- Maladie hématologique (du sang) ou maladie immunitaire (comme troubles de la coagulation, hémochromatose, lupus, prise de médicaments immunomodulateurs ou immunosuppresseurs, ...)
- Maladie endocrinienne, nutritionnelle ou métabolique (diabète, troubles thyroïdiens, syndrome métabolique, goutte, ...)
- Maladie du système nerveux (sclérose en plaques, accident vasculaire ischémique ou hémorragique, ...)
- Maladie de l'oeil et ses annexes (sauf pour le port de lunettes ou de lentilles de contact)
- Maladie de l'oreille ou du système vestibulaire (à l'exception de la diminution de l'audition à cause du bruit) (maladie de Ménière, vertiges périphériques positionnels bénins, ...)
- Maladie de l'appareil génito-urinaire (insuffisance rénale, calculs rénaux récurrents, ...)
- Maladie infectieuse (HIV, hépatite ou cirrhose d'origine virale, ...)
- Cancers (le diagnostic peut remonter jusqu'à 10 ans)

© MedCIS 2021

Page précédente Page suivante

Etude covid  
https://medsurveysdev.med.mil.be/process

Etude d'incidence Covid Long personnel de la Défense

SECRET MEDICAL

Information  
Consentement éclairé  
Données générales  
Symptômes Covid-19  
Etat de santé général

4/18

Symptômes Covid-19

Parmi la liste des symptômes ci-dessous, indiquez ceux dont vous avez souffert (ou dont vous souffrez toujours) depuis votre infection au covid-19. Pour chaque symptôme sélectionné, indiquez pendant combien de temps vous en avez souffert.

|                                                                           | Moins de 1 mois                  | Entre 1 et 3 mois                | Plus de 3 mois                   |
|---------------------------------------------------------------------------|----------------------------------|----------------------------------|----------------------------------|
| <input checked="" type="checkbox"/> Douleurs et/ou faiblesses musculaires | <input checked="" type="radio"/> | <input type="radio"/>            | <input type="radio"/>            |
| <input type="checkbox"/> Douleurs articulaires                            | <input type="radio"/>            | <input type="radio"/>            | <input type="radio"/>            |
| <input type="checkbox"/> Picotements et/ou engourdissement de la peau     | <input type="radio"/>            | <input type="radio"/>            | <input type="radio"/>            |
| <input type="checkbox"/> Douleurs ou oppression thoraciques               | <input type="radio"/>            | <input type="radio"/>            | <input type="radio"/>            |
| <input type="checkbox"/> Essoufflement ou difficultés respiratoires       | <input type="radio"/>            | <input type="radio"/>            | <input type="radio"/>            |
| <input type="checkbox"/> Toux                                             | <input type="radio"/>            | <input type="radio"/>            | <input type="radio"/>            |
| <input type="checkbox"/> Température élevée ou fièvre > 38°C              | <input type="radio"/>            | <input type="radio"/>            | <input type="radio"/>            |
| <input type="checkbox"/> Transpiration ou bouffées de chaleur             | <input type="radio"/>            | <input type="radio"/>            | <input type="radio"/>            |
| <input type="checkbox"/> Insomnie                                         | <input type="radio"/>            | <input type="radio"/>            | <input type="radio"/>            |
| <input checked="" type="checkbox"/> Maux de tête                          | <input type="radio"/>            | <input checked="" type="radio"/> | <input type="radio"/>            |
| <input type="checkbox"/> Nausées et/ou vomissements                       | <input type="radio"/>            | <input type="radio"/>            | <input type="radio"/>            |
| <input type="checkbox"/> Constipation et/ou diarrhée                      | <input type="radio"/>            | <input type="radio"/>            | <input type="radio"/>            |
| <input type="checkbox"/> Reflux gastrique (acidité)                       | <input type="radio"/>            | <input type="radio"/>            | <input type="radio"/>            |
| <input type="checkbox"/> Douleurs abdominales                             | <input type="radio"/>            | <input type="radio"/>            | <input type="radio"/>            |
| <input type="checkbox"/> Bouche sèche                                     | <input type="radio"/>            | <input type="radio"/>            | <input type="radio"/>            |
| <input type="checkbox"/> Problèmes de déglutition (pour avaler)           | <input type="radio"/>            | <input type="radio"/>            | <input type="radio"/>            |
| <input type="checkbox"/> Perte d'appétit                                  | <input type="radio"/>            | <input type="radio"/>            | <input type="radio"/>            |
| <input checked="" type="checkbox"/> Perte du goût                         | <input type="radio"/>            | <input type="radio"/>            | <input checked="" type="radio"/> |

© MedCIS 2021

Page précédente Page suivante

Etude d'incidence Covid Long personnel de la Défense

SECRET MEDICAL

Information  
Consentement éclairé  
Données générales  
▶ Symptômes Covid-19  
Etat de santé général

5/10

© MedCIS 2021

Page précédente Page suivante

**Symptômes Covid-19**

Parmi la liste des symptômes ci-dessous, indiquez ceux dont vous avez souffert (ou dont vous souffrez toujours) depuis votre infection au covid-19. Pour chaque symptôme sélectionné, indiquez pendant combien de temps vous en avez souffert.

|                                                                                                | Moins de 1 mois                  | Entre 1 et 3 mois                | Plus de 3 mois                   |
|------------------------------------------------------------------------------------------------|----------------------------------|----------------------------------|----------------------------------|
| <input checked="" type="checkbox"/> Perte de l'odorat                                          | <input type="radio"/>            | <input type="radio"/>            | <input checked="" type="radio"/> |
| <input type="checkbox"/> Perte de poids                                                        | <input type="radio"/>            | <input type="radio"/>            | <input type="radio"/>            |
| <input type="checkbox"/> Prise de poids                                                        | <input type="radio"/>            | <input type="radio"/>            | <input type="radio"/>            |
| <input type="checkbox"/> Gonflements (oedème)                                                  | <input type="radio"/>            | <input type="radio"/>            | <input type="radio"/>            |
| <input type="checkbox"/> Incontinence (fuites urinaires)                                       | <input type="radio"/>            | <input type="radio"/>            | <input type="radio"/>            |
| <input type="checkbox"/> Perte de cheveux                                                      | <input type="radio"/>            | <input type="radio"/>            | <input type="radio"/>            |
| <input type="checkbox"/> Cicatrisation difficile                                               | <input type="radio"/>            | <input type="radio"/>            | <input type="radio"/>            |
| <input checked="" type="checkbox"/> Peau sèche, douloureuse ou démangeaisons, éruption cutanée | <input type="radio"/>            | <input type="radio"/>            | <input type="radio"/>            |
| <input checked="" type="checkbox"/> Problèmes de vision                                        | <input type="radio"/>            | <input checked="" type="radio"/> | <input type="radio"/>            |
| <input type="checkbox"/> Problèmes d'audition                                                  | <input type="radio"/>            | <input type="radio"/>            | <input type="radio"/>            |
| <input type="checkbox"/> Problèmes d'élocution (difficulté à prononcer ou trouver ses mots)    | <input type="radio"/>            | <input type="radio"/>            | <input type="radio"/>            |
| <input type="checkbox"/> Problèmes de voix (voix rauque, perte de voix)                        | <input type="radio"/>            | <input type="radio"/>            | <input type="radio"/>            |
| <input type="checkbox"/> Problèmes de libido                                                   | <input type="radio"/>            | <input type="radio"/>            | <input type="radio"/>            |
| <input type="checkbox"/> Difficultés ou pertes de mémoire                                      | <input type="radio"/>            | <input type="radio"/>            | <input type="radio"/>            |
| <input type="checkbox"/> Problèmes de concentration                                            | <input type="radio"/>            | <input type="radio"/>            | <input type="radio"/>            |
| <input type="checkbox"/> Manque d'énergie                                                      | <input type="radio"/>            | <input type="radio"/>            | <input type="radio"/>            |
| <input type="checkbox"/> Fatigue ou épuisement                                                 | <input type="radio"/>            | <input type="radio"/>            | <input type="radio"/>            |
| <input checked="" type="checkbox"/> Sentiments d'agitation et/ou de nervosité                  | <input checked="" type="radio"/> | <input type="radio"/>            | <input type="radio"/>            |

Etude d'incidence Covid Long personnel de la Défense

SECRET MEDICAL

Information  
Consentement éclairé  
Données générales  
▶ Symptômes Covid-19  
Etat de santé général

6/10

© MedCIS 2021

Page précédente Page suivante

**Symptômes Covid-19**

Parmi la liste des symptômes ci-dessous, indiquez ceux dont vous avez souffert (ou dont vous souffrez toujours) depuis votre infection au covid-19. Pour chaque symptôme sélectionné, indiquez pendant combien de temps vous en avez souffert.

|                                                                    | Moins de 1 mois                  | Entre 1 et 3 mois                | Plus de 3 mois                   |
|--------------------------------------------------------------------|----------------------------------|----------------------------------|----------------------------------|
| <input checked="" type="checkbox"/> Changements d'humeur           | <input checked="" type="radio"/> | <input type="radio"/>            | <input type="radio"/>            |
| <input type="checkbox"/> Peur/anxiété                              | <input type="radio"/>            | <input type="radio"/>            | <input type="radio"/>            |
| <input type="checkbox"/> Sentiment d'abattement ou de déprime      | <input type="radio"/>            | <input type="radio"/>            | <input type="radio"/>            |
| <input checked="" type="checkbox"/> Stress                         | <input type="radio"/>            | <input type="radio"/>            | <input checked="" type="radio"/> |
| <input type="checkbox"/> Colère / agressivité                      | <input type="radio"/>            | <input type="radio"/>            | <input type="radio"/>            |
| <input type="checkbox"/> Sentiments extrêmes de bonheur (euphorie) | <input type="radio"/>            | <input type="radio"/>            | <input type="radio"/>            |
| <input type="checkbox"/> Sentiment d'abandon                       | <input type="radio"/>            | <input type="radio"/>            | <input type="radio"/>            |
| <input checked="" type="checkbox"/> Tristesse                      | <input type="radio"/>            | <input checked="" type="radio"/> | <input type="radio"/>            |
| <input type="checkbox"/> Irritabilité                              | <input type="radio"/>            | <input type="radio"/>            | <input type="radio"/>            |

Avez-vous été hospitalisé(e) à cause du covid-19 endéans le mois après le début de vos symptômes ?

Non

Oui, sans admission en unité de soins intensifs (USI)

Oui, avec admission en unité de soins intensifs (USI)

Etude covid

https://medsurveysdev.med.mil.be/process

Etude d'incidence Covid Long personnel de la Défense

**SECRET MEDICAL**

Information  
Consentement éclairé  
Données générales  
Symptômes Covid-19  
▶ **Etat de santé général**

7/19

© MedCIS 2021

Page précédente Page suivante

**Votre état de santé**

Veillez sélectionner la proposition qui correspond le mieux à votre état de santé avant votre Covid-19 et aujourd'hui

**MOBILITE**

| AVANT VOTRE COVID-19                                                               | AUJOURD'HUI                                                              |
|------------------------------------------------------------------------------------|--------------------------------------------------------------------------|
| <input checked="" type="radio"/> Je n'avais aucun problème pour me déplacer à pied | <input type="radio"/> Je n'ai aucun problème pour me déplacer à pied     |
| <input type="radio"/> J'avais des problèmes légers pour me déplacer à pied         | <input type="radio"/> J'ai des problèmes légers pour me déplacer à pied  |
| <input type="radio"/> J'avais des problèmes modérés pour me déplacer à pied        | <input type="radio"/> J'ai des problèmes modérés pour me déplacer à pied |
| <input type="radio"/> J'avais des problèmes sévères pour me déplacer à pied        | <input type="radio"/> J'ai des problèmes sévères pour me déplacer à pied |
| <input type="radio"/> J'étais incapable de me déplacer à pied                      | <input checked="" type="radio"/> Je suis incapable de me déplacer à pied |

**AUTONOMIE DE LA PERSONNE**

| AVANT VOTRE COVID-19                                                                                   | AUJOURD'HUI                                                                                  |
|--------------------------------------------------------------------------------------------------------|----------------------------------------------------------------------------------------------|
| <input checked="" type="radio"/> Je n'avais aucun problème pour me laver ou m'habiller tout(e) seul(e) | <input type="radio"/> Je n'ai aucun problème pour me laver ou m'habiller tout(e) seul(e)     |
| <input type="radio"/> J'avais des problèmes légers pour me laver ou m'habiller tout(e) seul(e)         | <input type="radio"/> J'ai des problèmes légers pour me laver ou m'habiller tout(e) seul(e)  |
| <input type="radio"/> J'avais des problèmes modérés pour me laver ou m'habiller tout(e) seul(e)        | <input type="radio"/> J'ai des problèmes modérés pour me laver ou m'habiller tout(e) seul(e) |
| <input type="radio"/> J'avais des problèmes sévères pour me laver ou m'habiller tout(e) seul(e)        | <input type="radio"/> J'ai des problèmes sévères pour me laver ou m'habiller tout(e) seul(e) |
| <input type="radio"/> J'étais incapable de me laver ou m'habiller tout(e) seul(e)                      | <input checked="" type="radio"/> Je suis incapable de me laver ou m'habiller tout(e) seul(e) |

Etude covid

https://medsurveysdev.med.mil.be/process

Etude d'incidence Covid Long personnel de la Défense

**SECRET MEDICAL**

Information  
Consentement éclairé  
Données générales  
Symptômes Covid-19  
▶ **Etat de santé général**

8/19

© MedCIS 2021

Page précédente Page suivante

**Votre état de santé**

Veillez sélectionner la proposition qui correspond le mieux à votre état de santé avant votre Covid-19 et aujourd'hui

**ACTIVITES COURANTES**  
(exemples: travail, études, travaux ménagers, activités familiales ou loisirs)

| AVANT VOTRE COVID-19                                                                              | AUJOURD'HUI                                                                             |
|---------------------------------------------------------------------------------------------------|-----------------------------------------------------------------------------------------|
| <input checked="" type="radio"/> Je n'avais aucun problème pour accomplir mes activités courantes | <input type="radio"/> Je n'ai aucun problème pour accomplir mes activités courantes     |
| <input type="radio"/> J'avais des problèmes légers pour accomplir mes activités courantes         | <input type="radio"/> J'ai des problèmes légers pour accomplir mes activités courantes  |
| <input type="radio"/> J'avais des problèmes modérés pour accomplir mes activités courantes        | <input type="radio"/> J'ai des problèmes modérés pour accomplir mes activités courantes |
| <input type="radio"/> J'avais des problèmes sévères pour accomplir mes activités courantes        | <input type="radio"/> J'ai des problèmes sévères pour accomplir mes activités courantes |
| <input type="radio"/> J'étais incapable d'accomplir mes activités courantes                       | <input checked="" type="radio"/> Je suis incapable d'accomplir mes activités courantes  |

**DOULEURS / GÊNES**

| AVANT VOTRE COVID-19                                              | AUJOURD'HUI                                                               |
|-------------------------------------------------------------------|---------------------------------------------------------------------------|
| <input checked="" type="radio"/> Je n'avais ni douleurs ni gêne   | <input type="radio"/> Je n'ai ni douleurs ni gêne                         |
| <input type="radio"/> J'avais des douleurs ou une gêne légère(s)  | <input type="radio"/> J'ai des douleurs ou une gêne légère(s)             |
| <input type="radio"/> J'avais des douleurs ou une gêne modérée(s) | <input type="radio"/> J'ai des douleurs ou une gêne modérée(s)            |
| <input type="radio"/> J'avais des douleurs ou une gêne sévère(s)  | <input type="radio"/> J'ai des douleurs ou une gêne sévère(s)             |
| <input type="radio"/> J'avais des douleurs ou une gêne extrême(s) | <input checked="" type="radio"/> J'ai des douleurs ou une gêne extrême(s) |

Etude covid  
https://medsurveysdev.med.mil.be/process

Etude d'incidence Covid Long personnel de la Défense

**SECRET MEDICAL**

Information  
Consentement éclairé  
Données générales  
Symptômes Covid-19  
▶ **Etat de santé général**

**9/10**  
●●●●●●●○

© MedCIS 2021

Page précédente Page suivante

**ANXIÉTÉ / DÉPRESSION**

**AVANT VOTRE COVID-19**      **AUJOURD'HUI**

|                                                                           |                                                                                |
|---------------------------------------------------------------------------|--------------------------------------------------------------------------------|
| <input checked="" type="radio"/> Je n'étais ni anxieux(se), ni déprimé(e) | <input type="radio"/> Je ne suis ni anxieux(se), ni déprimé(e)                 |
| <input type="radio"/> J'étais légèrement anxieux(se) ou déprimé(e)        | <input type="radio"/> Je suis légèrement anxieux(se) ou déprimé(e)             |
| <input type="radio"/> J'étais modérément anxieux(se) ou déprimé(e)        | <input type="radio"/> Je suis modérément anxieux(se) ou déprimé(e)             |
| <input type="radio"/> J'étais sévèrement anxieux(se) ou déprimé(e)        | <input type="radio"/> Je suis sévèrement anxieux(se) ou déprimé(e)             |
| <input type="radio"/> J'étais extrêmement anxieux(se) ou déprimé(e)       | <input checked="" type="radio"/> Je suis extrêmement anxieux(se) ou déprimé(e) |

Etude covid  
https://medsurveysdev.med.mil.be/process

Etude d'incidence Covid Long personnel de la Défense

**SECRET MEDICAL**

Information  
Consentement éclairé  
Données générales  
Symptômes Covid-19  
▶ **Etat de santé général**

**9/10**  
●●●●●●●○

© MedCIS 2021

Page précédente Valider

**ANXIÉTÉ / DÉPRESSION**

**Nous aimerions comparer la manière dont vous percevez votre état de santé avant et après votre covid-19.**  
Sur une échelle de 0 à 100, comment évaluez-vous votre santé **AVANT** votre infection covid-19 ?

0 : la pire santé que vous puissiez imaginer - 100 : la meilleure santé que vous puissiez imaginer

100

Sur une échelle de 0 à 100, comment évaluez-vous votre santé **AUJOURD'HUI** ?

0 : la pire santé que vous puissiez imaginer - 100 : la meilleure santé que vous puissiez imaginer

0

**Y a-t-il autre chose en lien avec votre covid dont vous souhaiteriez nous parler ?**

Texte libre ...
